# Supplementary material for: Demographics Prediction and Heatmap Generation From OCT Images of Anterior Segment of the Eye: A Vision Transformer Model Study
Source: PubMed Central journal article supplement — Transl Vis Sci Technol. 2022 Nov 10;11(11):7. doi: 10.1167/tvst.11.11.7 (PMC9652725; doi:10.1167/tvst.11.11.7), 2022-11-10

**Supplementary Figure 1.** Number of participants included in analyses for each demographic characteristic. **(A)** Age  $\leq 75$  vs.  $> 75$  years. **(B)** Age  $\leq 60$  vs. 60–75 vs.  $> 75$  years. **(C)** Sex. **(D)** Body mass index (BMI)  $< 23$  vs. 23–25 vs.  $\geq 25$  kg/m<sup>2</sup>. **(E)** Height  $\leq 170$  vs.  $> 170$  cm in males. **(F)** Height  $\leq 155$  vs.  $> 155$  cm in females. **(G)** Weight  $< 70$  vs.  $\geq 70$  kg in males. **(H)** Weight  $< 55$  vs.  $\geq 55$  kg in females.

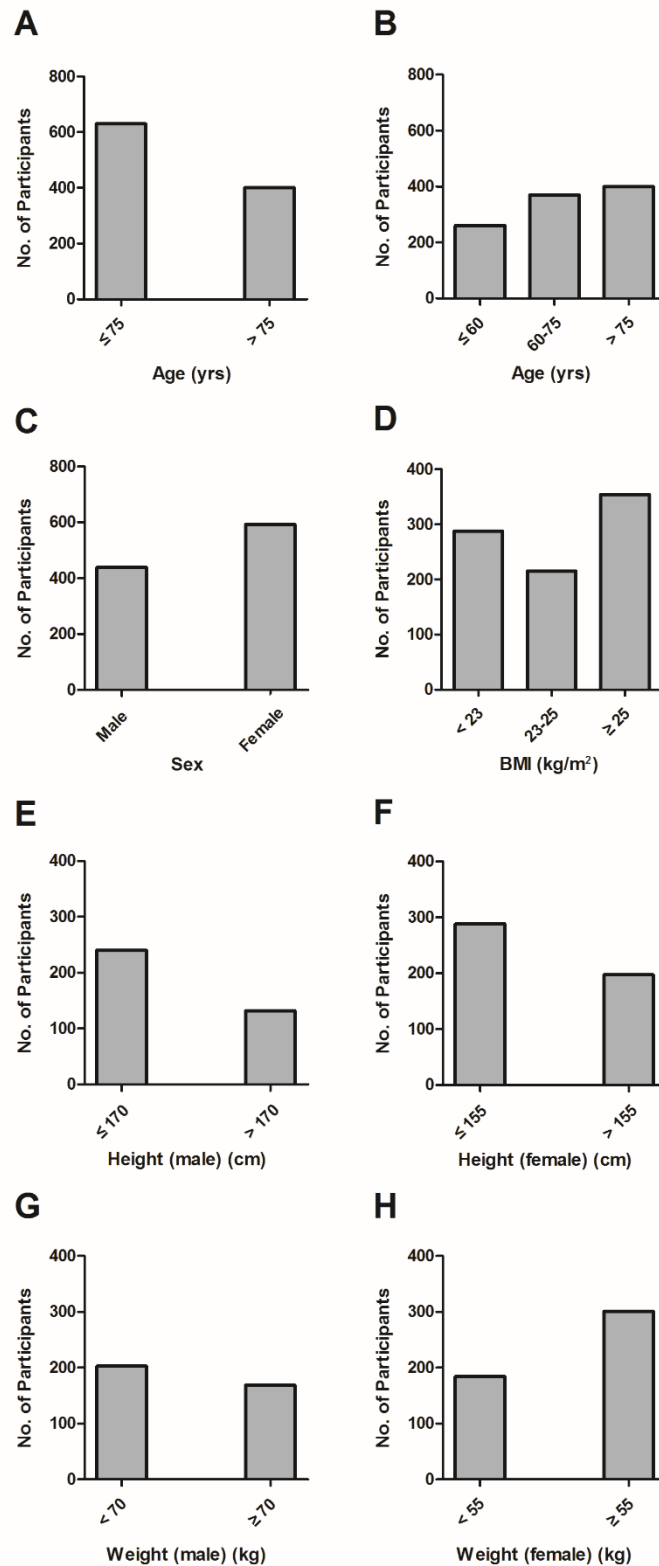

Supplement: tvst-11-11-7_s001.pdf [file tvst-11-11-7_s001.pdf]
