# Supplementary material for: Demographics Prediction and Heatmap Generation From OCT Images of Anterior Segment of the Eye: A Vision Transformer Model Study
Source: PubMed Central journal article supplement — Transl Vis Sci Technol. 2022 Nov 10;11(11):7. doi: 10.1167/tvst.11.11.7 (PMC9652725; doi:10.1167/tvst.11.11.7), 2022-11-10

**Supplementary Figure 2.** Representative anterior segment optical coherence tomography (AS-OCT) images of participants of different ages. The AS-OCT images of a 51-year-old female (**A**), a 65-year-old female (**B**), and a 78-year-old male (**C**) present difficulties in visually identifying the structural differences according to age.

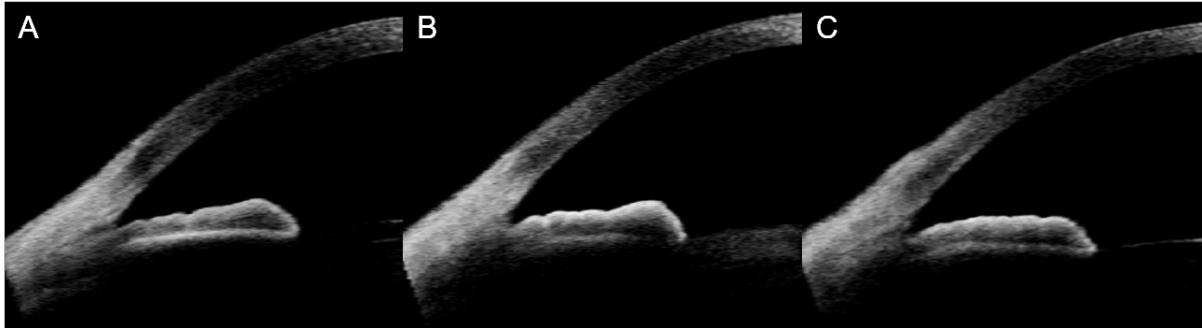

Supplement: tvst-11-11-7_s002.pdf [file tvst-11-11-7_s002.pdf]
