# Supplementary material for: Demographics Prediction and Heatmap Generation From OCT Images of Anterior Segment of the Eye: A Vision Transformer Model Study
Source: PubMed Central journal article supplement — Transl Vis Sci Technol. 2022 Nov 10;11(11):7. doi: 10.1167/tvst.11.11.7 (PMC9652725; doi:10.1167/tvst.11.11.7), 2022-11-10
Supplement: tvst-11-11-7_s003.pdf [file tvst-11-11-7_s003.pdf]

**Supplementary Table. Summary of Studies Related to Prediction of Demographic Characteristics from OCT Images Using Deep Learning**

| Study                 | Application         | Architecture<br>(Base model) | Performance |         |              |       |                  | Limitation                                                                                                                                                                                                                                                                                      |
|-----------------------|---------------------|------------------------------|-------------|---------|--------------|-------|------------------|-------------------------------------------------------------------------------------------------------------------------------------------------------------------------------------------------------------------------------------------------------------------------------------------------|
|                       |                     |                              | Acc*        | AUC*    | MAE†<br>(yr) | r†    | R <sup>2</sup> † |                                                                                                                                                                                                                                                                                                 |
| Shigueoka et al, 2021 | Age prediction      | ResNet50                     | -           | 0.962‡  | 5.82         | 0.860 | 0.74             | Highly variable results in each patient                                                                                                                                                                                                                                                         |
| Hassan et al, 2021    | Age, sex prediction | 3D ResNet50                  | 0.76        | 0.85    | 4.2          | -     | 0.74             | Highly variable results in each patient                                                                                                                                                                                                                                                         |
|                       |                     | 3D BagNet33                  | 0.78        | 0.86    | 4.0          | -     | 0.77             |                                                                                                                                                                                                                                                                                                 |
| Munk et al, 2021      | Age, sex prediction | ResNet152                    | 0.76        | 0.84    | 5.625        | -     | -                | Use of combination of methods<br>(whereby the network outputs age bins<br>that are normalized using a softmax<br>activation $w$ and multiplied by the bins<br>lower edge $d_x$ ) for age prediction,<br>which could cause overfitting and<br>result in a DL model vulnerable to<br>domain shift |
|                       |                     |                              | (BScan)     | (BScan) | (BScan)      |       |                  |                                                                                                                                                                                                                                                                                                 |
|                       |                     |                              | 0.83        | 0.90    | 4.541        |       |                  |                                                                                                                                                                                                                                                                                                 |
|                       |                     |                              | (CScan)     | (CScan) | (CScan)      |       |                  |                                                                                                                                                                                                                                                                                                 |
| Chueh et al, 2022     | Age, sex prediction | ResNet18                     | 0.856       | -       | 5.78         | -     | -                | No separation of test dataset when<br>applying 10-fold cross-validation,<br>which could exaggerate the DL<br>model's performance                                                                                                                                                                |

Acc, accuracy; AUC, area under the receiver operating characteristic curve; DL, deep learning; MAE, mean absolute error; OCT, optical coherence tomography;  $r$ , Pearson's correlation coefficient;  $R^2$ , coefficient of determination.

\*For sex prediction.

†For age prediction.

‡For discriminating the lowest and highest tertiles of age.
